# Supplementary material
Source: PubMed Central journal article supplement (PMC11349311)
Supplement: NIHMS1967328-supplement-Supplemental_Material.pdf [file NIHMS1967328-supplement-Supplemental_Material.pdf]

## **Race, gender, and cohort differences in the educational experiences of Black and White Americans**

<sup>1</sup>Katrina M. Walsemann, Ph.D., <sup>2</sup>Calley E. Fisk, Ph.D., <sup>3</sup>Mateo P. Farina, Ph.D., <sup>1</sup>Emily Abbruzzi, MPH, <sup>2</sup>Jennifer A. Ailshire, Ph.D.

<sup>1</sup>School of Public Policy and Maryland Population Research Center, University of Maryland, College Park

<sup>2</sup>Leonard Davis School of Gerontology, University of Southern California, Los Angeles

<sup>3</sup>Department of Human Development and Family Sciences and Population Research Center, University of Texas, Austin

**Corresponding Author:** Katrina M. Walsemann, Ph.D. ([kwalsema@umd.edu](mailto:kwalsema@umd.edu))

**Journal:** Population Research and Policy Review

**Table A1.** Educational experiences of HRS-LHMS respondents by race, weighted data.

|                                           | White, non-Hispanic<br>n=8,382<br>Mean (SE) or % | Black, non-Hispanic<br>n=2,250<br>Mean (SE) or % | Total<br>n=10,632<br>Mean (SE) or % |
|-------------------------------------------|--------------------------------------------------|--------------------------------------------------|-------------------------------------|
| Attended preschool, %                     | 14.1                                             | 18.4*                                            | 14.5                                |
| Learning differences, %                   | 13.4                                             | 17.5*                                            | 13.8                                |
| Math ability                              | 3.44 (0.01)                                      | 3.35 (0.03)*                                     | 3.43 (0.01)                         |
| Reading ability                           | 3.58 (0.01)                                      | 3.61 (0.03)                                      | 3.59 (0.01)                         |
| Proportion of schooling attending         |                                                  |                                                  |                                     |
| Private schools                           | 0.14 (0.00)                                      | 0.04 (0.00)*                                     | 0.13 (0.00)                         |
| Majority non-White schools                | 0.02 (0.00)                                      | 0.81 (0.01)*                                     | 0.10 (0.00)                         |
| Ever attended a race discordant school, % | 9.4                                              | 39.0*                                            | 12.2                                |
| Did not attend high school                | 2.8                                              | 7.7*                                             | 3.3                                 |
| Rs that attended high school              | n=7,343                                          | n=1,756                                          | n=9,099                             |
| High school coursework, %                 |                                                  |                                                  |                                     |
| Vocational                                | 17.7                                             | 21.5*                                            | 18.0                                |
| General                                   | 46.9                                             | 52.8*                                            | 47.4                                |
| College preparatory                       | 35.5                                             | 25.7*                                            | 34.6                                |
| Foreign language courses, %               |                                                  |                                                  |                                     |
| No                                        | 43.8                                             | 59.9*                                            | 45.2                                |
| Yes                                       | 56.2                                             | 40.1*                                            | 54.8                                |
| Art participation, %                      |                                                  |                                                  |                                     |
| No                                        | 45.0                                             | 45.2                                             | 45.1                                |
| Yes                                       | 55.0                                             | 54.8                                             | 54.9                                |
| Years of schooling                        | 13.88 (0.05)                                     | 12.84 (0.10)*                                    | 13.78 (0.05)                        |
| Post-secondary education, %               | 68.7                                             | 57.4*                                            | 67.6                                |
| Bachelor's degree, %                      | 34.3                                             | 17.7*                                            | 32.7                                |

Notes: Math and reading ability range from 1-5 with higher values indicating better ability. Proportion of schooling in majority non-White schools and private schools ranges from 0-1. Ever attended a race discordant school defined for White respondents as ever attending a majority non-White school and for Black respondents as ever attending a majority non-White school. Percentages for high school coursework, foreign language coursework, and art participation reported only for respondents who attended high school; observations are reported for each group in the column sub-header. Estimates for years of schooling, post-secondary education and bachelor's degree are reported for all respondents.

\*  $p < 0.025$ , mlincom command

**Table A2.** Educational experiences of HRS-LHMS respondents by gender, weighted data.

|                                           | Men<br>n=4,264<br>Mean (SE) or % | Women<br>n=6,368<br>Mean (SE) or % | Total<br>n=10,632<br>Mean (SE) or % |
|-------------------------------------------|----------------------------------|------------------------------------|-------------------------------------|
| Attended preschool, %                     | 15.8                             | 13.4*                              | 14.5                                |
| Learning differences, %                   | 17.5                             | 10.8*                              | 13.8                                |
| Math ability                              | 3.51 (0.02)                      | 3.37 (0.01)*                       | 3.43 (0.01)                         |
| Reading ability                           | 3.37 (0.02)                      | 3.76 (0.02)*                       | 3.59 (0.01)                         |
| Proportion of schooling attending         |                                  |                                    |                                     |
| Private schools                           | 0.13 (0.01)                      | 0.13 (0.01)                        | 0.13 (0.00)                         |
| Majority non-White schools                | 0.09 (0.01)                      | 0.11 (0.01)*                       | 0.10 (0.00)                         |
| Ever attended a race discordant school, % | 12.5                             | 12.0                               | 12.2                                |
| Did not attend high school                | 3.6                              | 3.1                                | 3.3                                 |
| Rs that attended high school              | n=3,620                          | n=5,479                            | n=9,099                             |
| High school coursework, %                 |                                  |                                    |                                     |
| Vocational                                | 17.1                             | 18.8                               | 18.0                                |
| General                                   | 48.1                             | 46.9                               | 47.4                                |
| College preparatory                       | 34.8                             | 34.3                               | 34.6                                |
| Foreign language courses, %               |                                  |                                    |                                     |
| No                                        | 49.0                             | 42.2*                              | 45.2                                |
| Yes                                       | 51.0                             | 57.8*                              | 54.8                                |
| Art participation, %                      |                                  |                                    |                                     |
| No                                        | 54.3                             | 37.6*                              | 45.1                                |
| Yes                                       | 45.7                             | 62.4*                              | 54.9                                |
| Years of schooling                        | 13.95 (0.06)                     | 13.64 (0.06)*                      | 13.78 (0.05)                        |
| Post-secondary education, %               | 69.8                             | 65.8*                              | 67.6                                |
| Bachelor's degree, %                      | 36.9                             | 29.3*                              | 32.7                                |

Notes: Math and reading ability range from 1-5 with higher values indicating better ability. Proportion of schooling in majority non-White schools and private schools ranges from 0-1. Ever attended a race discordant school defined for White respondents as ever attending a majority non-White school and for Black respondents as ever attending a majority non-White school. Percentages for high school coursework, foreign language coursework, and art courses reported only for respondents who attended high school; observations are reported for each group in column subheaders. Estimates for years of schooling, post-secondary education and bachelor's degree are reported for all respondents.

\* p<0.025, mlincom command

**Table A3** Educational experiences of HRS-LHMS respondents by race, gender, and HRS birth cohort, weighted data, N=10,632

|                                   | White, non-Hispanic Men |                     |                               |                                  |             | White, non-Hispanic Women |                     |                               |                                    |             |
|-----------------------------------|-------------------------|---------------------|-------------------------------|----------------------------------|-------------|---------------------------|---------------------|-------------------------------|------------------------------------|-------------|
|                                   | HRS<br>n=1,100          | War Babies<br>n=539 | Early Baby<br>Boomer<br>n=663 | Mid/Late Baby<br>Boomer<br>n=890 | %<br>Change | HRS<br>n=1,424            | War Babies<br>n=838 | Early Baby<br>Boomer<br>n=870 | Mid/Late Baby<br>Boomer<br>n=1,286 | %<br>Change |
| Attended preschool, %             | 9.9                     | 12.3                | 14.1                          | 22.6                             | 128.3       | 8.7                       | 11.6                | 11.4                          | 17.9                               | 105.7       |
| Learning differences, %           | 12.5                    | 14.6                | 16.3                          | 22.6                             | 80.8        | 6.8*                      | 7.6*                | 8.6*                          | 15.4*                              | 126.5       |
| Math ability                      | 3.5 (0.02)              | 3.5 (0.04)          | 3.6 (0.05)                    | 3.5 (0.04)                       | 1.4         | 3.4 (0.02)*               | 3.4 (0.04)          | 3.4 (0.04)*                   | 3.4 (0.04)*                        | -0.6        |
| Reading ability                   | 3.3 (0.03)              | 3.4 (0.05)          | 3.4 (0.05)                    | 3.4 (0.04)                       | 0.9         | 3.8 (0.03)*               | 3.9 (0.04)*         | 3.8 (0.04)*                   | 3.7 (0.03)*                        | -2.9        |
| Proportion of schooling attending |                         |                     |                               |                                  |             |                           |                     |                               |                                    |             |
| Private schools                   | 0.12 (0.01)             | 0.16 (0.02)         | 0.17 (0.01)                   | 0.12 (0.01)                      | 0.0         | 0.12 (0.01)               | 0.15 (0.01)         | 0.15 (0.01)                   | 0.14 (0.01)                        | 16.7        |
| Majority non-White schools        | 0.01 (0.00)             | 0.02 (0.00)         | 0.02 (0.00)                   | 0.04 (0.01)                      | 300.0       | 0.01 (0.00)               | 0.02 (0.00)         | 0.02 (0.00)                   | 0.04 (0.01)                        | 300.0       |
| Ever race discordant school, %    | 7.8                     | 8.5                 | 7.1                           | 13.4                             | 70.5        | 7.1                       | 6.8                 | 7.6                           | 12.5                               | 76.1        |
| Did not attend high school, %     | 6.7                     | 2.8                 | 2.0                           | 1.8                              | -73.1       | 3.6*                      | 2.6                 | 1.8                           | 1.1                                | -69.4       |
| Rs that attended high school      |                         |                     |                               |                                  |             |                           |                     |                               |                                    |             |
| High school coursework, %         |                         |                     |                               |                                  |             |                           |                     |                               |                                    |             |
| Vocational                        | 16.4                    | 15.6                | 13.7                          | 19.4                             | 18.3        | 21.8*                     | 20.4                | 18.5                          | 15.5                               | -28.9       |
| General                           | 57.9                    | 48.3                | 43.7                          | 44.3                             | -23.5       | 49.7*                     | 39.7*               | 44.3                          | 47.3                               | -4.8        |
| College preparatory               | 25.7                    | 36.2                | 42.6                          | 36.3                             | 41.2        | 28.5                      | 39.9                | 37.2                          | 37.2                               | 30.5        |
| Foreign language courses, %       |                         |                     |                               |                                  |             |                           |                     |                               |                                    |             |
| No                                | 62.0                    | 50.6                | 37.3                          | 44.6                             | -28.1       | 51.5*                     | 42.2*               | 32.7                          | 36.6*                              | -28.9       |
| Yes                               | 38.0                    | 49.4                | 62.7                          | 55.4                             | 45.8        | 48.5*                     | 57.8*               | 67.3                          | 63.4*                              | 30.7        |
| Art participation, %              |                         |                     |                               |                                  |             |                           |                     |                               |                                    |             |
| No                                | 57.3                    | 54.7                | 58.6                          | 50.4                             | -12.0       | 36.8*                     | 36.8*               | 41.0*                         | 32.8*                              | -10.9       |
| Yes                               | 42.7                    | 45.3                | 41.4                          | 49.6                             | 16.2        | 63.2*                     | 63.2*               | 59.0*                         | 67.2*                              | 6.3         |
| Years of schooling                | 13.5 (0.09)             | 14.1 (0.13)         | 14.5 (0.11)                   | 14.0 (0.11)                      | 4.2         | 13.1 (0.08)*              | 13.6 (0.11)*        | 14.1 (0.11)*                  | 14.0 (0.10)                        | 6.8         |
| Post-secondary education, %       | 62.4                    | 70.9                | 79.9                          | 71.3                             | 14.3        | 54.0*                     | 62.9*               | 73.0*                         | 74.7                               | 38.3        |
| Bachelor's degree, %              | 33.0                    | 39.3                | 45.1                          | 37.2                             | 12.7        | 21.3*                     | 28.5*               | 36.0*                         | 35.5                               | 66.7        |

Notes:

Percent change calculated using percent difference between HRS cohort and Mid/Late Baby Boomer cohort. Math and reading ability range from 1-5 with higher values indicating better ability. Proportion of schooling in majority non-White schools and private schools ranges from 0-1. Ever attended a race discordant school defined for White respondents as ever attending a majority non-White school and for Black respondents as ever attending a majority non-White school. Percentages for high school coursework, foreign language coursework, and art participation reported only for respondents who attended high school; observations are reported for each group in column subheaders. Estimates for years of schooling, post-secondary education and bachelor's degree are reported for all respondents.

\* significantly different from men at p<0.025 level, within race and cohort comparisons

■ significantly different from HRS cohort at p<0.025 level, within race and gender comparisons

▨ significantly different from War Babies cohort at p<0.025 level, within race and gender comparisons

▣ significantly different from Early Baby Boomer cohort at p<0.025 level, within race and gender comparisons

mlncom command used to test for statistically significant differences between groups.

Table A3 continued

|                                   | Black, non-Hispanic Men |                    |                    |                      |          | Black, non-Hispanic Women |                    |                    |                      |          |
|-----------------------------------|-------------------------|--------------------|--------------------|----------------------|----------|---------------------------|--------------------|--------------------|----------------------|----------|
|                                   | HRS                     | War Babies         | Early Baby Boomer  | Mid/Late Baby Boomer | % Change | HRS                       | War Babies         | Early Baby Boomer  | Mid/Late Baby Boomer | % Change |
|                                   | n=145                   | n=88               | n=212              | n=338                |          | n=273                     | n=157              | n=370              | n=611                |          |
| Attended preschool, %             | 15.7                    | 14.7               | 17.6               | 20.9                 | 33.1     | <b>16.6</b>               | 12.1               | 16.1               | <b>24.8</b>          | 49.4     |
| Learning differences, %           | 21.6                    | 15.4               | 15.8               | 27.0                 | 25.0     | 11.7                      | <b>17.2</b>        | <b>17.3</b>        | 15.0*                | 28.2     |
| Math ability                      | 3.4 (0.08)              | 3.4 (0.11)         | <b>3.4 (0.08)</b>  | <b>3.3 (0.06)</b>    | -3.2     | 3.3 (0.05)                | <b>3.2 (0.07)</b>  | 3.4 (0.05)         | 3.4 (0.05)           | 2.1      |
| Reading ability                   | 3.4 (0.09)              | 3.4 (0.10)         | 3.5 (0.11)         | 3.4 (0.05)           | 1.2      | <b>3.6 (0.06)</b>         | 3.6 (0.09)         | 3.9 (0.06)*        | 3.7 (0.05)*          | 3.3      |
| Proportion of schooling attending |                         |                    |                    |                      |          |                           |                    |                    |                      |          |
| Private schools                   | 0.06 (0.02)             | <b>0.02 (0.01)</b> | <b>0.04 (0.01)</b> | <b>0.05 (0.01)</b>   | -16.7    | <b>0.07 (0.02)</b>        | <b>0.03 (0.01)</b> | <b>0.04 (0.01)</b> | <b>0.04 (0.01)</b>   | -42.9    |
| Majority non-White schools        | <b>0.89 (0.03)</b>      | <b>0.86 (0.03)</b> | <b>0.80 (0.04)</b> | <b>0.75 (0.03)</b>   | -15.7    | <b>0.91 (0.01)</b>        | <b>0.88 (0.03)</b> | <b>0.82 (0.02)</b> | <b>0.74 (0.02)</b>   | -18.7    |
| Ever race discordant school, %    | <b>31.0</b>             | <b>28.3</b>        | <b>41.6</b>        | <b>50.6</b>          | 63.2     | <b>24.2</b>               | <b>24.6</b>        | <b>35.1</b>        | <b>51.8</b>          | 114.0    |
| Did not attend high school, %     | <b>17.3</b>             | 8.9                | 5.6                | 2.9                  | -83.2    | <b>14.9</b>               | <b>8.9</b>         | <b>6.4</b>         | <b>3.6</b>           | -75.8    |
| Rs that attended high school      | n=94                    | n=67               | n=162              | n=273                |          | n=205                     | n=124              | n=306              | n=490                |          |
| High school coursework, %         |                         |                    |                    |                      |          |                           |                    |                    |                      |          |
| Vocational                        | 25.3                    | 24.8               | <b>23.5</b>        | 23.3                 | -7.9     | 18.2                      | 16.5               | 12.9*              | <b>26.2</b>          | 44.0     |
| General                           | 62.2                    | 54.8               | 47.9               | 42.3                 | -32.0    | <b>61.7</b>               | <b>62.5</b>        | <b>59.3</b>        | <b>46.9</b>          | -24.0    |
| College preparatory               | <b>12.6</b>             | 20.4               | 28.7               | 34.5                 | 173.8    | <b>20.1</b>               | <b>21.0</b>        | 27.8               | <b>26.9</b>          | 33.8     |
| Foreign language courses, %       |                         |                    |                    |                      |          |                           |                    |                    |                      |          |
| No                                | 69.1                    | <b>72.2</b>        | <b>63.8</b>        | <b>62.9</b>          | -9.0     | 58.5                      | <b>59.7</b>        | <b>53.4</b>        | <b>53.9</b>          | -7.9     |
| Yes                               | 30.9                    | <b>27.8</b>        | <b>36.2</b>        | <b>37.1</b>          | 20.1     | 41.5                      | <b>40.3</b>        | <b>46.6</b>        | <b>46.1</b>          | 11.1     |
| Art participation, %              |                         |                    |                    |                      |          |                           |                    |                    |                      |          |
| No                                | 56.1                    | 56.4               | 46.0               | 45.5                 | -18.9    | 40.3                      | 49.1               | 47.3               | 37.2                 | -7.7     |
| Yes                               | 43.9                    | 43.6               | 54.0               | 54.5                 | 24.1     | 59.7                      | 50.9               | 52.7               | 62.8                 | 5.2      |
| Years of schooling                | <b>11.6 (0.4)</b>       | <b>12.4 (0.2)</b>  | <b>13.1 (0.2)</b>  | <b>13.2 (0.2)</b>    | 14.2     | <b>12.1 (0.2)</b>         | <b>12.5 (0.3)</b>  | <b>13.4 (0.2)</b>  | <b>13.3 (0.1)</b>    | 9.6      |
| Post-secondary education, %       | <b>33.4</b>             | <b>42.3</b>        | <b>59.9</b>        | <b>59.2</b>          | 77.2     | 50.8                      | 55.0               | 68.8               | <b>65.0</b>          | 28.0     |
| Bachelor's degree, %              | <b>10.7</b>             | <b>13.8</b>        | <b>17.2</b>        | <b>17.0</b>          | 58.9     | 15.0                      | <b>16.7</b>        | <b>23.5</b>        | <b>19.9</b>          | 32.7     |

Notes:

Percent change calculated using percent difference between HRS cohort and Mid/Late Baby Boomer cohort. Math and reading ability range from 1-5 with higher values indicating better ability. Proportion of schooling in majority non-White schools and private schools ranges from 0-1. Ever attended a race discordant school defined for White respondents as ever attending a majority non-White school and for Black respondents as ever attending a majority non-White school. Percentages for high school coursework, foreign language coursework, and art participation reported only for respondents who attended high school; observations are reported for each group in column subheaders. Estimates for years of schooling, post-secondary education and bachelor's degree are reported for all respondents.

\* significantly different from men at p<0.025 level, within race and cohort comparisons

**bolded** significantly different from non-Hispanic White peers at p<0.025 level, within gender and cohort comparisons

■ significantly different from HRS cohort at p<0.025 level, within race and gender comparisons

▨ significantly different from War Babies cohort at p<0.025 level, within race and gender comparisons

□ significantly different from Early Baby Boomer cohort at p<0.025 level, within race and gender comparisons

mlogit command used to test for statistically significant differences between groups.

**Table A4.** Sample characteristics of core HRS sample (2014-2018) compared to HRS-LHMS subsample and predicted odds ratios from logistic regression models predicting inclusion in HRS-LHMS subsample, weighted data.

|                                         | Demographics & Bivariate Associations |                  | Pr(Inclusion in LHMS)<br>n=16,960 |
|-----------------------------------------|---------------------------------------|------------------|-----------------------------------|
|                                         | HRS<br>n=16,960                       | LHMS<br>n=10,333 |                                   |
|                                         | Mean (SE) or %                        | Mean (SE) or %   | OR (95% CI)                       |
| <b>Race/Ethnicity</b>                   |                                       |                  |                                   |
| White, non-Hispanic                     | 88.9                                  | 91.0*            | REF                               |
| Black, non-Hispanic                     | 11.1                                  | 9.0*             | 0.68 (0.59-0.77)**                |
| <b>Gender</b>                           |                                       |                  |                                   |
| Male                                    | 46.6                                  | 44.5*            | REF                               |
| Female                                  | 53.4                                  | 55.5*            | 1.31 (1.21-1.41)**                |
| <b>Birth Cohort</b>                     |                                       |                  |                                   |
| AHEAD/CODA                              | 6.7                                   | 5.7*             | 0.49 (0.43-0.55)**                |
| HRS                                     | 15.7                                  | 17.3*            | REF                               |
| War Babies                              | 15.7                                  | 18.8*            | 1.37 (1.22-1.54)**                |
| Early Baby Boomers                      | 20.4                                  | 23.7*            | 1.15 (1.03-1.29)                  |
| Mid/Late Baby Boomers                   | 41.5                                  | 34.6*            | 0.44 (0.38-0.52)**                |
| <b>Census Region (at birth)</b>         |                                       |                  |                                   |
| Northeast                               | 24.0                                  | 24.2             | REF                               |
| Midwest                                 | 34.0                                  | 36.2*            | 1.24 (1.04-1.47)                  |
| South                                   | 29.8                                  | 27.9*            | 0.92 (0.78-1.10)                  |
| West                                    | 11.2                                  | 10.7             | 0.90 (0.71-1.15)                  |
| Foreign country or U.S. territory       | 1.0                                   | 1.0              | 1.08 (0.68-1.69)                  |
| Bachelor's degree (yes)                 | 31.1                                  | 33.0*            | 1.16 (1.03-1.32)                  |
| Years of schooling                      | 13.65 (0.04)                          | 13.78 (0.05)*    |                                   |
| Self-rated health (0=poor, 4=excellent) | 2.21 (0.01)                           | 2.29 (0.01)*     | 1.23 (1.17-1.29)**                |

Notes:

Birth years for each cohort include <1930 (AHEAD/CODA), 1931-1941 (HRS), 1942-1947 (War Babies), 1948-1953 (Early Baby Boomers), and 1954-1965 (Mid/Late Baby Boomers), HS=high-school. Years of schooling excluded from logistic regression analysis due to collinearity. LHMS sample uses non-imputed data and is therefore slightly reduced from sample we use in our main analysis.

\*\*p<.001; \*p<.025; REF=reference group

**Table A5.** Sample characteristics of core HRS sample (2014-2018) compared to HRS-LHMS subsample by cohort, weighted data

|                                      | AHEAD/CODA     |               | HRS            |                 | War Babies     |                 | Early Baby Boomers |                 | Mid/Late Baby Boomers |                 |
|--------------------------------------|----------------|---------------|----------------|-----------------|----------------|-----------------|--------------------|-----------------|-----------------------|-----------------|
|                                      | HRS<br>n=1,746 | LHMS<br>n=832 | HRS<br>n=4,335 | LHMS<br>n=2,933 | HRS<br>n=2,149 | LHMS<br>n=1,612 | HRS<br>n=2,825     | LHMS<br>n=2,051 | HRS<br>n=5,905        | LHMS<br>n=2,905 |
| Race/Ethnicity                       |                |               |                |                 |                |                 |                    |                 |                       |                 |
| White, NH                            | 92.0           | 93.9*         | 91.0           | 92.4*           | 90.0           | 91.0*           | 89.0               | 90.6*           | 87.2                  | 90.1*           |
| Black, NH                            | 8.0            | 6.1*          | 9.0            | 7.6*            | 10.0           | 9.0*            | 11.0               | 9.4*            | 12.8                  | 9.9*            |
| Gender                               |                |               |                |                 |                |                 |                    |                 |                       |                 |
| Male                                 | 36.4           | 33.8          | 44.6           | 43.5*           | 47.7           | 46.5            | 48.0               | 47.2            | 47.9                  | 43.8*           |
| Female                               | 63.6           | 66.2          | 55.4           | 56.5*           | 52.3           | 53.5            | 52.0               | 52.8            | 52.1                  | 56.2*           |
| Census Region (at birth)             |                |               |                |                 |                |                 |                    |                 |                       |                 |
| Northeast                            | 23.3           | 23.0          | 24.1           | 24.1            | 24.0           | 25.0            | 24.3               | 23.1            | 24.0                  | 24.8            |
| Midwest                              | 38.3           | 40.8          | 33.7           | 34.8            | 30.2           | 31.0            | 36.0               | 39.1*           | 33.9                  | 36.9*           |
| South                                | 29.4           | 28.1          | 31.7           | 30.1*           | 34.6           | 33.3            | 28.3               | 26.1*           | 28.0                  | 25.2*           |
| West                                 | 7.9            | 6.6           | 9.6            | 10.2            | 10.7           | 10.2            | 10.3               | 10.6            | 13.1                  | 12.0            |
| Foreign country<br>or U.S. territory | 1.1            | 1.5           | 0.9            | 0.9             | 0.7            | 0.6             | 1.1                | 1.2             | 1.0                   | 1.0             |
| Bachelor's degree                    | 21.8           | 24.9*         | 23.7           | 25.1*           | 29.7           | 31.9*           | 36.5               | 38.6*           | 33.3                  | 35.0            |
| Years of schooling                   | 12.7 (0.1)     | 13.0 (0.1)*   | 13.1 (0.1)     | 13.2 (0.1)*     | 13.5 (0.1)     | 13.7 (0.1)*     | 14.1 (0.1)         | 14.2 (0.1)*     | 13.9 (0.1)            | 14.0 (0.1)      |
| Self-rated health                    | 1.8 (0.03)     | 2.0 (0.04)*   | 2.0 (0.02)     | 2.1 (0.02)*     | 2.2 (0.02)     | 2.3 (0.03)*     | 2.3 (0.03)         | 2.4 (0.03)*     | 2.3 (0.03)            | 2.4 (0.03)*     |

Notes: Mean (SE) or % reported

Birth years for each cohort include <1930 (AHEAD/CODA), 1931-1941 (HRS), 1942-1947 (War Babies), 1948-1953 (Early Baby Boomers), and 1954-1965 (Mid/Late Baby Boomers), NH=non-Hispanic, HS=high-school. Self-rated health measured on a 0 to 4 scale; 0=poor, 4=excellent. Years of schooling excluded from logistic regression analysis due to collinearity. LHMS sample uses non-imputed data and is therefore slightly reduced from sample we use in our main analysis.

\* significantly different from full sample at  $p<.025$ , adjusted Wald test

**Table A6.** Predicted odds ratios from logistic regression models predicting inclusion in HRS-LHMS subsample, weighted data.

|                                   | AHEAD/CODA         | HRS                | War Babies         | Early Baby Boomers | Mid/Late Baby Boomers |
|-----------------------------------|--------------------|--------------------|--------------------|--------------------|-----------------------|
|                                   | n=1,746            | n=4,335            | n=2,149            | n=2,825            | n=5,905               |
|                                   | OR (95% CI)           |
| Race/Ethnicity                    |                    |                    |                    |                    |                       |
| White, non-Hispanic               | REF                | REF                | REF                | REF                | REF                   |
| Black, non-Hispanic               | 0.65 (0.42-1.00)   | 0.67 (0.52-0.87)*  | 0.79 (0.55-1.11)   | 0.76 (0.58-0.99)   | 0.62 (0.50-0.78)**    |
| Gender                            |                    |                    |                    |                    |                       |
| Male                              | REF                | REF                | REF                | REF                | REF                   |
| Female                            | 1.36 (1.12-1.65)*  | 1.21 (1.05-1.39)*  | 1.26 (1.02-1.54)   | 1.16 (0.96-1.39)   | 1.42 (1.26-1.60)**    |
| Census Region (at birth)          |                    |                    |                    |                    |                       |
| Northeast                         | REF                | REF                | REF                | REF                | REF                   |
| Midwest                           | 1.21 (0.82-1.80)   | 1.12 (0.92-1.36)   | 0.94 (0.69-1.28)   | 1.84 (1.27-2.67)*  | 1.16 (0.87-1.54)      |
| South                             | 1.04 (0.70-1.54)   | 0.99 (0.80-1.22)   | 0.85 (0.60-1.21)   | 1.11 (0.75-1.65)   | 0.85 (0.65-1.10)      |
| West                              | 0.69 (0.42-1.12)   | 1.24 (0.90-1.71)   | 0.70 (0.46-1.06)   | 1.40 (0.85-2.31)   | 0.79 (0.53-1.18)      |
| Foreign country or U.S. territory | 2.41 (0.82-7.08)   | 0.92 (0.51-1.66)   | 0.54 (0.15-1.88)   | 1.50 (0.54-4.12)   | 1.03 (0.50-2.11)      |
| Bachelor's degree                 | 1.62 (1.20-2.19)*  | 1.14 (0.93-1.39)   | 1.39 (1.00-1.94)   | 1.22 (0.94-1.57)   | 1.07 (0.85-1.35)      |
| Self-rated health                 | 1.28 (1.13-1.43)** | 1.39 (1.30-1.48)** | 1.43 (1.29-1.59)** | 1.39 (1.28-1.52)** | 1.08 (0.99-1.18)      |

Notes:

Birth years for each cohort include <1930 (AHEAD/CODA), 1931-1941 (HRS), 1942-1947 (War Babies), 1948-1953 (Early Baby Boomers), and 1954-1965 (Mid/Late Baby Boomers), HS=high-school. Self-rated health measured on a 0 to 4 scale; 0=poor, 4=excellent. Years of schooling excluded from logistic regression analysis due to collinearity. LHMS sample uses non-imputed data and is therefore slightly reduced from sample we use in our analysis.

\*\*p<.001; \*p<.025; REF=reference group
